# Supplementary material for: A Novel Wearable Device for Continuous Ambulatory ECG Recording: Proof of Concept and Assessment of Signal Quality
Source: PubMed Central journal article supplement (PMC6468449; doi:10.3390/bios9010017), 2019-01-21
Supplement: biosensors-09-00017-s001.pdf [file biosensors-09-00017-s001.pdf]

**Table S1.** Sizing chart of OMgarments.

| Size | <i>Under-chest circumference (cm)</i> |       |
|------|---------------------------------------|-------|
|      | Men                                   | Women |
| XS   | 90–96                                 | 66–71 |
| S    | 96–101                                | 71–78 |
| M    | 101–106                               | 78–85 |
| L    | 106–112                               | 85–96 |

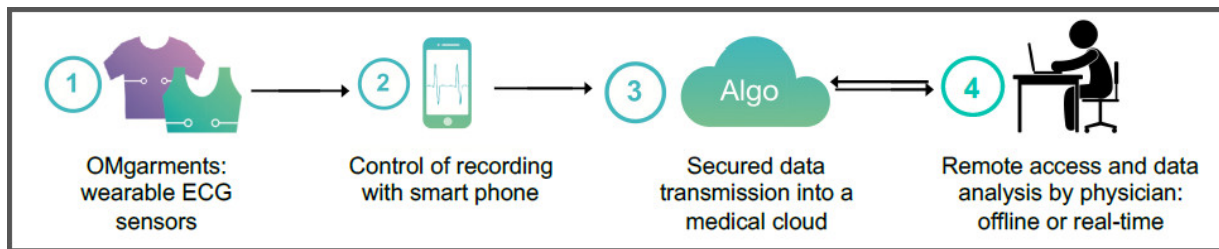

**Figure S1.** Cloud-based data transmission and remote rhythm analysis.

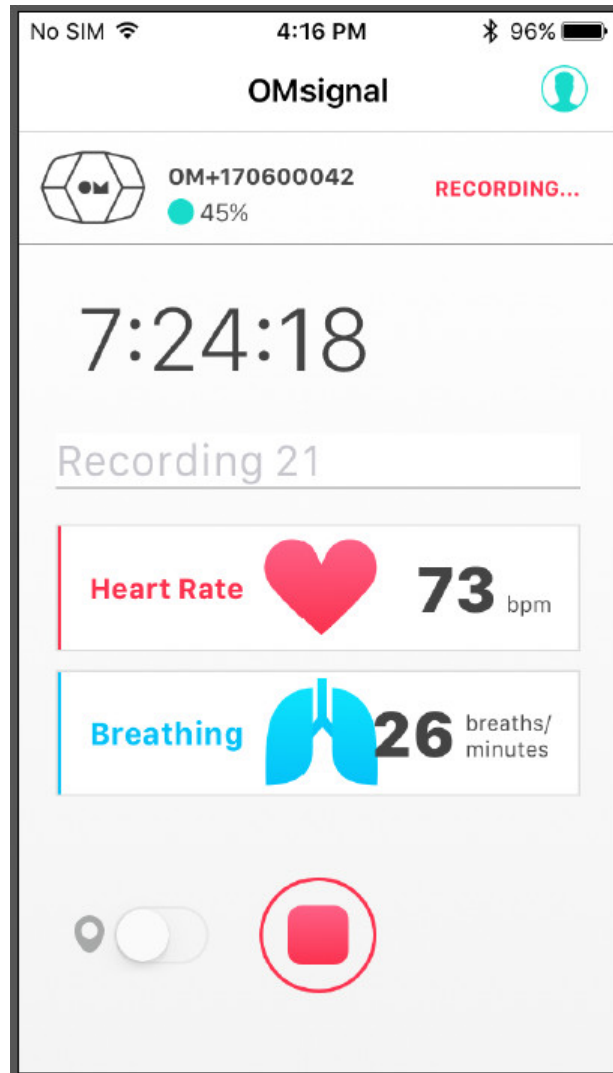

**Figure S2.** Smartphone application for real-time monitoring and data transmission.

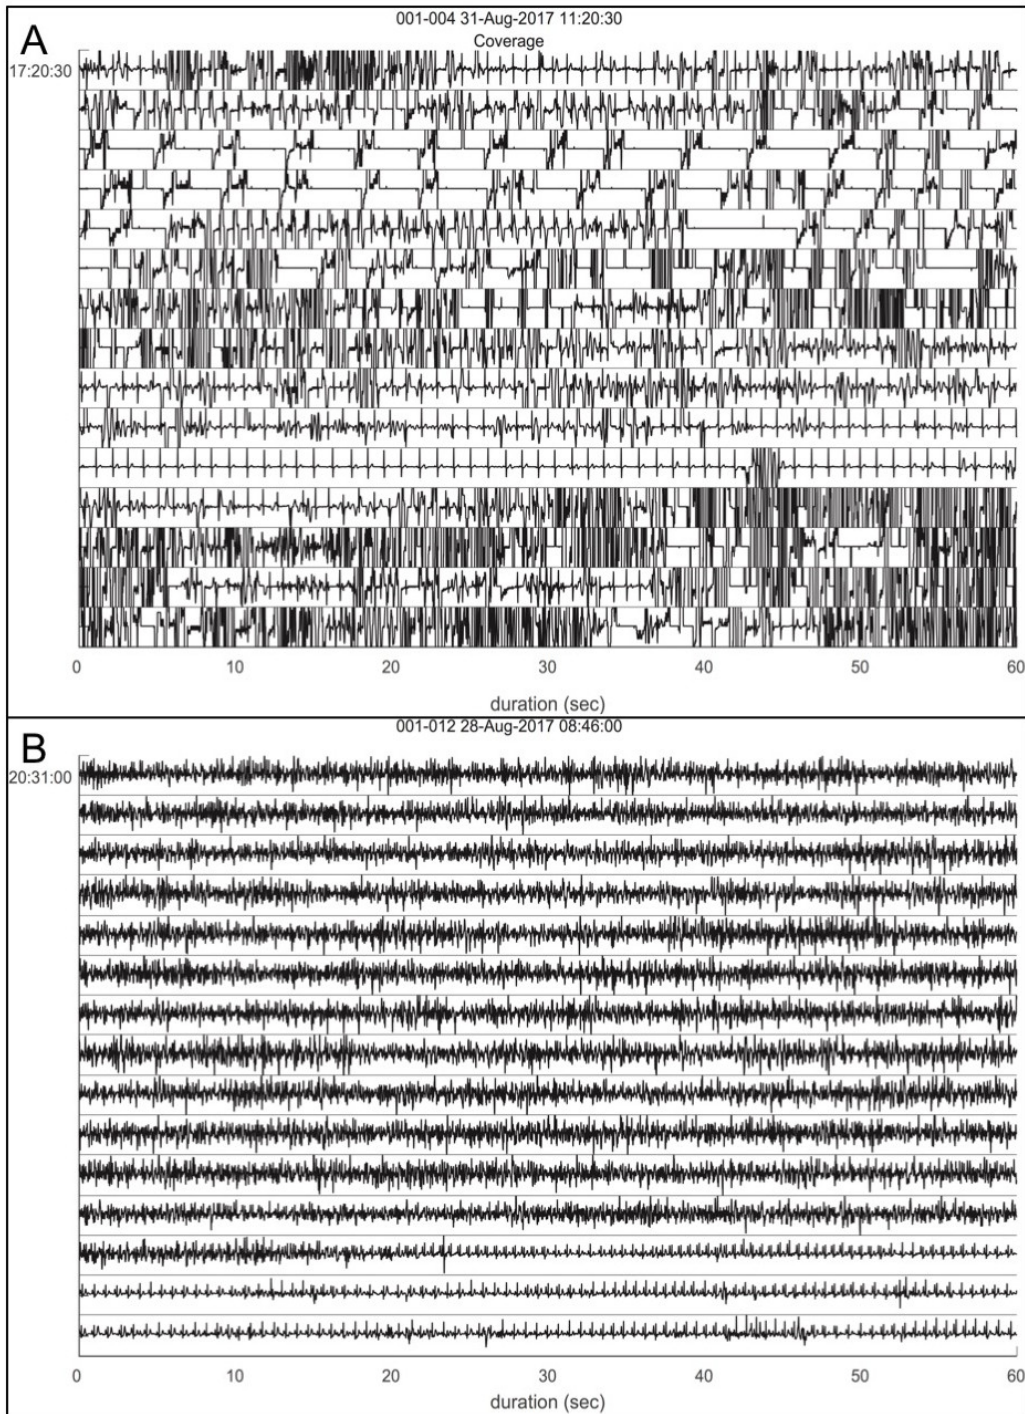

**Figure S3.** Examples of noise recordings. (A) Shown is a representative example of noise recording with the OMgarment in a male study subject. Noise detection was caused by suboptimal electrode – skin contact. (B) Example of noise recording from a Holter monitoring (Spiderflash, LivaNova). Noise recording was related to moving artefacts.

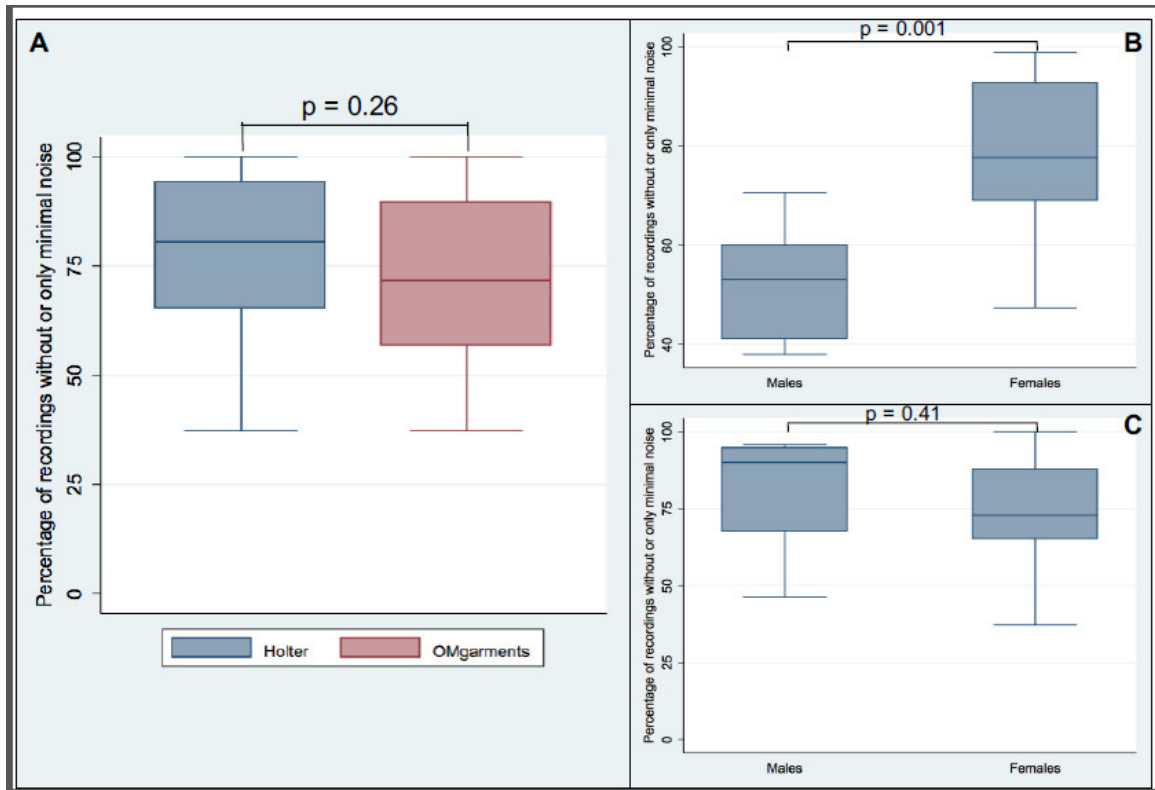

**Figure 4.** Comparison of noise levels between OMgarments and Holter. Shown are box plots of the overall percentages of ECG recordings without noise or only minimal noise. Minimal noise was defined as <25% of noise recording over each analysis block of 15 minutes for a 24-h recording period. (A) The overall noise level did not show any difference between OMgarments and Holter recording. (B-C) Among the OMgarments, significantly more noise was recorded in males compared to females (B), whereas Holter recordings did not show any sex-related differences (C).
